# Supplementary material
Source: PubMed Central journal article supplement (PMC2096417)
Supplement: NIHMS34040-supplement-01.pdf [file NIHMS34040-supplement-01.pdf]

## Supplemental Data

Table S1: Data collection and structure determination statistics.

| Dataset                            | NBD-linker/Apo        | NBD-linker/ADP        | NBD-linker/ADP*Vi     |
|------------------------------------|-----------------------|-----------------------|-----------------------|
| A. Data processing                 |                       |                       |                       |
| Space group                        | P2 <sub>1</sub>       | P2 <sub>1</sub>       | P2 <sub>1</sub>       |
| Unit cell parameters               |                       |                       |                       |
| a (Å)                              | 73.336                | 73.306                | 73.336                |
| b (Å)                              | 78.236                | 77.962                | 77.841                |
| c (Å)                              | 75.462                | 75.320                | 75.793                |
| α (deg.)                           | 90                    | 90                    | 90                    |
| β (deg.)                           | 100.806               | 101.458               | 101.533               |
| γ (deg.)                           | 90                    | 90                    | 90                    |
| Resolution (Å)                     | 50.0-1.85 (1.92-1.85) | 50.0-1.75 (1.81-1.75) | 50.0-1.86 (1.93-1.86) |
| No. of reflections                 | 203449                | 303138                | 256805                |
| No. of unique reflections          | 70516 (7093)          | 83895 (8294)          | 70267 (6981)          |
| Wavelength (Å)                     | 1.54                  | 1.54                  | 1.54                  |
| Completeness (%)                   | 98.7 (99.9)           | 100 (100)             | 100 (99.8)            |
| Multiplicity                       | 2.9 (2.8)             | 3.6 (3.5)             | 3.7 (3.5)             |
| Mosaicity (deg.)                   | 0.739                 | 0.500                 | 0.399                 |
| R <sub>sym</sub> (%)               | 4.8 (47.2)            | 3.3 (23.4)            | 6.1 (41.5)            |
| < I/σ >                            | 19.8 (2.1)            | 29.1 (3.9)            | 17.9 (2.9)            |
| B. Refinement statistics           |                       |                       |                       |
| Resolution range (Å)               | 35.09-1.85            | 35.16-1.75            | 36.06-1.86            |
| R <sub>cryst</sub> (%)             | 20.2                  | 17.7                  | 18.8                  |
| R <sub>free</sub> (%)              | 23.6                  | 20.9                  | 22.4                  |
| Average B factor (Å <sup>2</sup> ) | 30.121                | 12.886                | 12.398                |
| RMSD bonds (Å)                     | 0.012                 | 0.011                 | 0.010                 |
| RMSD angles (deg.)                 | 1.232                 | 1.233                 | 1.173                 |
| Ramachandran analysis              |                       |                       |                       |
| Most favored (%)                   | 92.2                  | 93.1                  | 93.8                  |
| Additionally allowed (%)           | 7.8                   | 6.8                   | 6.2                   |
| Generously allowed (%)             | ---                   | 0.1                   | ---                   |

| Dataset                                         | NBD: J/ADP*Pi                                 | NBD-linker: J/ADP*Pi (#1)                     | NBD-linker: J/ADP*Pi (#2)                     |
|-------------------------------------------------|-----------------------------------------------|-----------------------------------------------|-----------------------------------------------|
| Space group                                     | P2 <sub>1</sub> 2 <sub>1</sub> 2 <sub>1</sub> | P2 <sub>1</sub> 2 <sub>1</sub> 2 <sub>1</sub> | P2 <sub>1</sub> 2 <sub>1</sub> 2 <sub>1</sub> |
| a (Å)                                           | 38.627                                        | 38.698                                        | 38.654                                        |
| b (Å)                                           | 58.262                                        | 58.543                                        | 58.641                                        |
| c (Å)                                           | 225.929                                       | 226.236                                       | 225.558                                       |
| α (deg.)                                        | 90                                            | 90                                            | 90                                            |
| β (deg.)                                        | 90                                            | 90                                            | 90                                            |
| γ (deg.)                                        | 90                                            | 90                                            | 90                                            |
| Resolution (Å)                                  | 50.0-2.40 (2.49-2.40)                         | 50.0-1.70 (1.76-1.70)                         | 50.0-1.75 (1.81-1.75)                         |
| No. of reflections                              | 75243                                         | 370038                                        | 289951                                        |
| No. of unique reflections                       | 20512 (2044)                                  | 56529 (4806)                                  | 48554 (3092)                                  |
| Wavelength (Å)                                  | 1.54                                          | 1.00                                          | 1.00                                          |
| Completeness (%)                                | 97.3 (99.9)                                   | 98.2 (84.7)                                   | 91.2 (59.4)                                   |
| Multiplicity                                    | 3.7 (3.7)                                     | 6.5 (4.0)                                     | 6.0 (4.8)                                     |
| Mosaicity (deg.)                                | 0.634                                         | 0.42                                          | 0.34                                          |
| R <sub>sym</sub> (%)                            | 9.4 (58.2)                                    | 6.4 (49.6)                                    | 8.0 (51.8)                                    |
| < I/σ >                                         | 13.1 (2.5)                                    | 26.8 (3.1)                                    | 19.4 (2.4)                                    |
| B. Refinement statistics                        |                                               |                                               |                                               |
| Resolution range (Å)                            | 113.23-2.40                                   | 40.69-1.70                                    | 40.66-1.75                                    |
| R <sub>cryst</sub> (%)                          | 20.8                                          | 19.3                                          | 20.2                                          |
| R <sub>free</sub> (%)                           | 27.9                                          | 22.2                                          | 24.2                                          |
| Average B factor (Å <sup>2</sup> )              | 41.045                                        | 28.203                                        | 27.892                                        |
| RMSD bonds (Å)                                  | 0.011                                         | 0.011                                         | 0.011                                         |
| RMSD angles (deg.)                              | 1.334                                         | 1.217                                         | 1.235                                         |
| Ramachandran analysis                           |                                               |                                               |                                               |
| Most favored (%)                                | 93.2                                          | 93.2                                          | 93.7                                          |
| Additionally allowed (%)                        | 6.8                                           | 6.1                                           | 5.9                                           |
| Generously allowed (%)                          | ---                                           | 0.5                                           | ---                                           |
| Overall coordinate error<br>(from free Rfactor) | ---                                           | 0.133 Å                                       | 0.108 Å                                       |

| Dataset                                         | NBD-linker: J/AMPPNP                          |             |
|-------------------------------------------------|-----------------------------------------------|-------------|
| Space group                                     | P2 <sub>1</sub> 2 <sub>1</sub> 2 <sub>1</sub> |             |
| a (Å)                                           | 38.797                                        |             |
| b (Å)                                           | 56.494                                        |             |
| c (Å)                                           | 225.878                                       |             |
| α (deg.)                                        | 90                                            |             |
| β (deg.)                                        | 90                                            |             |
| γ (deg.)                                        | 90                                            |             |
| Resolution (Å)                                  | 50.0-2.20 (2.28-2.20)                         |             |
| No. of reflections                              | 86413                                         |             |
| No. of unique reflections                       | 25924 (2561)                                  |             |
| Wavelength (Å)                                  | 1.54                                          |             |
| Completeness (%)                                | 99.8 (100)                                    |             |
| Multiplicity                                    | 3.3 (3.3)                                     |             |
| Mosaicity (deg.)                                | 0.968                                         |             |
| R <sub>sym</sub> (%)                            | 7.2                                           |             |
| < I/σ >                                         | 14.3 (2.4)                                    |             |
| B. Refinement statistics                        |                                               |             |
|                                                 | hydrolyzed form                               | intact from |
| Resolution range (Å)                            | 31.67-2.21                                    | 31.67-2.21  |
| R <sub>cryst</sub> (%)                          | 24.0                                          | 23.0        |
| R <sub>free</sub> (%)                           | 29.5                                          | 29.4        |
| Average B factor (Å <sup>2</sup> )              | 40.861                                        | 45.339      |
| RMSD bonds (Å)                                  | 0.014                                         | 0.014       |
| RMSD angles (deg.)                              | 1.395                                         | 1.527       |
| Ramachandran analysis                           |                                               |             |
| Most favored (%)                                | 92.2                                          | 92.2        |
| Additionally allowed (%)                        | 7.8                                           | 7.8         |
| Overall coordinate error<br>(from free Rfactor) | 0.263 Å                                       | 0.261 Å     |

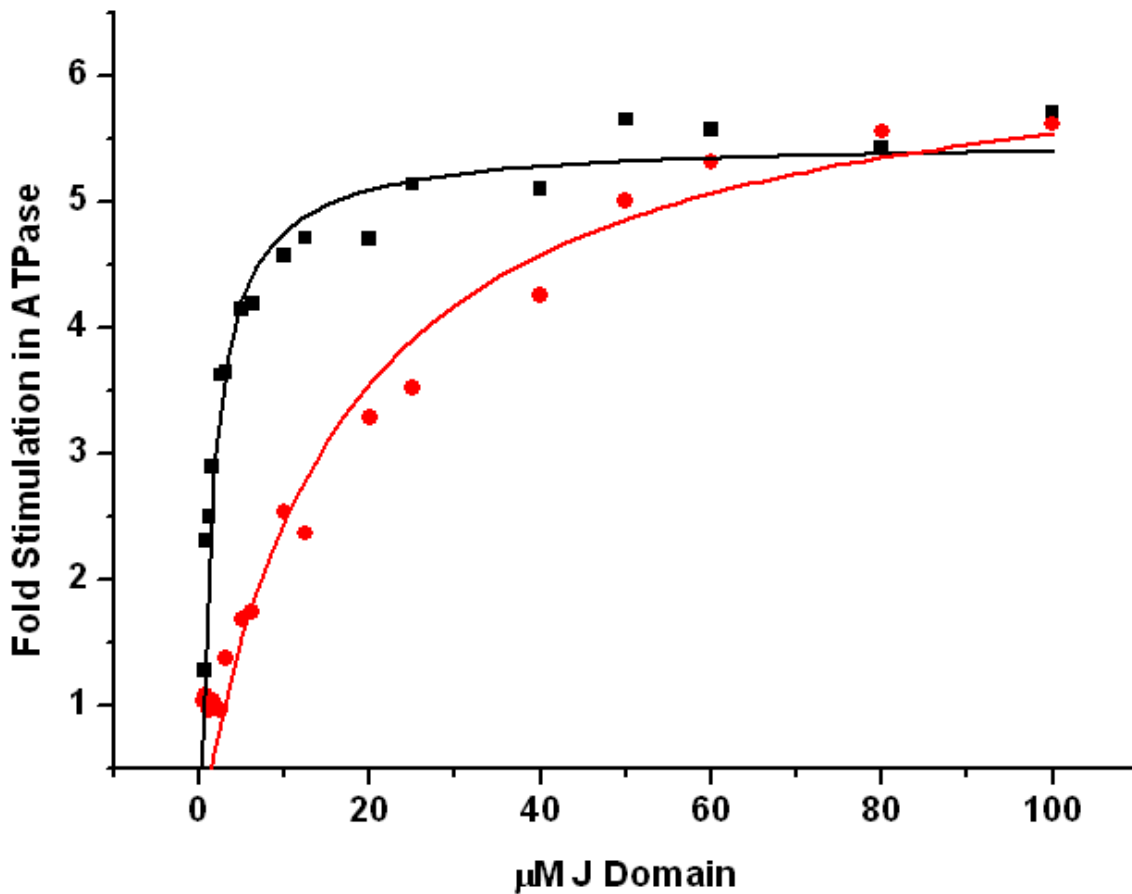

Fig. S1. Fold stimulation of 2-domain (aa 1-554: black curve) or NBD\_linker (aa 1-394:red curve) Hsc70 ATPase activity as a function of auxilin J domain concentration. Hyperbolic fits are shown. Maximal stimulation of 2-domain Hsc70 is  $5.4 \pm 0.1$  fold with half-maximal stimulation occurring at  $1.5 \pm 0.14$   $\mu\text{M}$  J domain (chi-square=0.059). For the NBD\_Linker the corresponding values were:  $6.4 \pm 0.4$  and  $16.2 \pm 2.96$   $\mu\text{M}$  (chi-square=0.17).

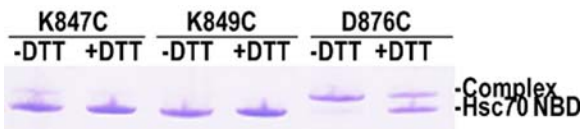

Fig. S2. Preparation of auxilin J domain:NBD complexes. Hsc70 NBD (aa 1-386) with cysteine substituted for R171 was mixed with 1 mM DTT and auxilin J domains (aa 803-910) bearing the indicated cysteine substitutions and dialyzed overnight against buffer with no reducing agent. Samples were then resolved on SDS PAGE in either the absence, or presence, of 2 mM DTT, as indicated.

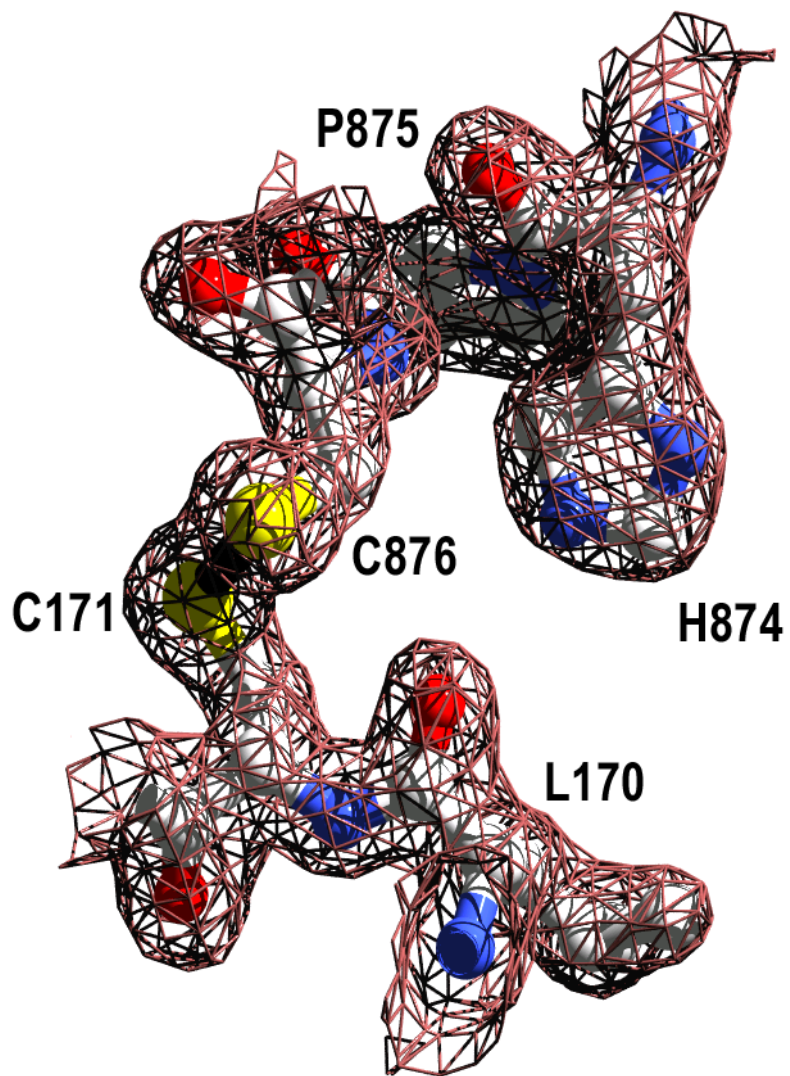

Fig. s3: Representative electron density (contoured at 1.0  $\sigma$ ) around the J domain H874P875D876 motif (HPC in this mutant) and disulfide cross-link from the ADP\*Pi\*J\*NBD\_Linker structure with carbons in white, oxygens in red, nitrogens in blue, and sulfurs in yellow.
